# Supplementary material for: Operation of a brain-computer interface walking simulator for individuals with spinal cord injury
Source: PubMed Central journal article supplement (PMC3723437; doi:10.1186/1743-0003-10-77), 2013-07-17

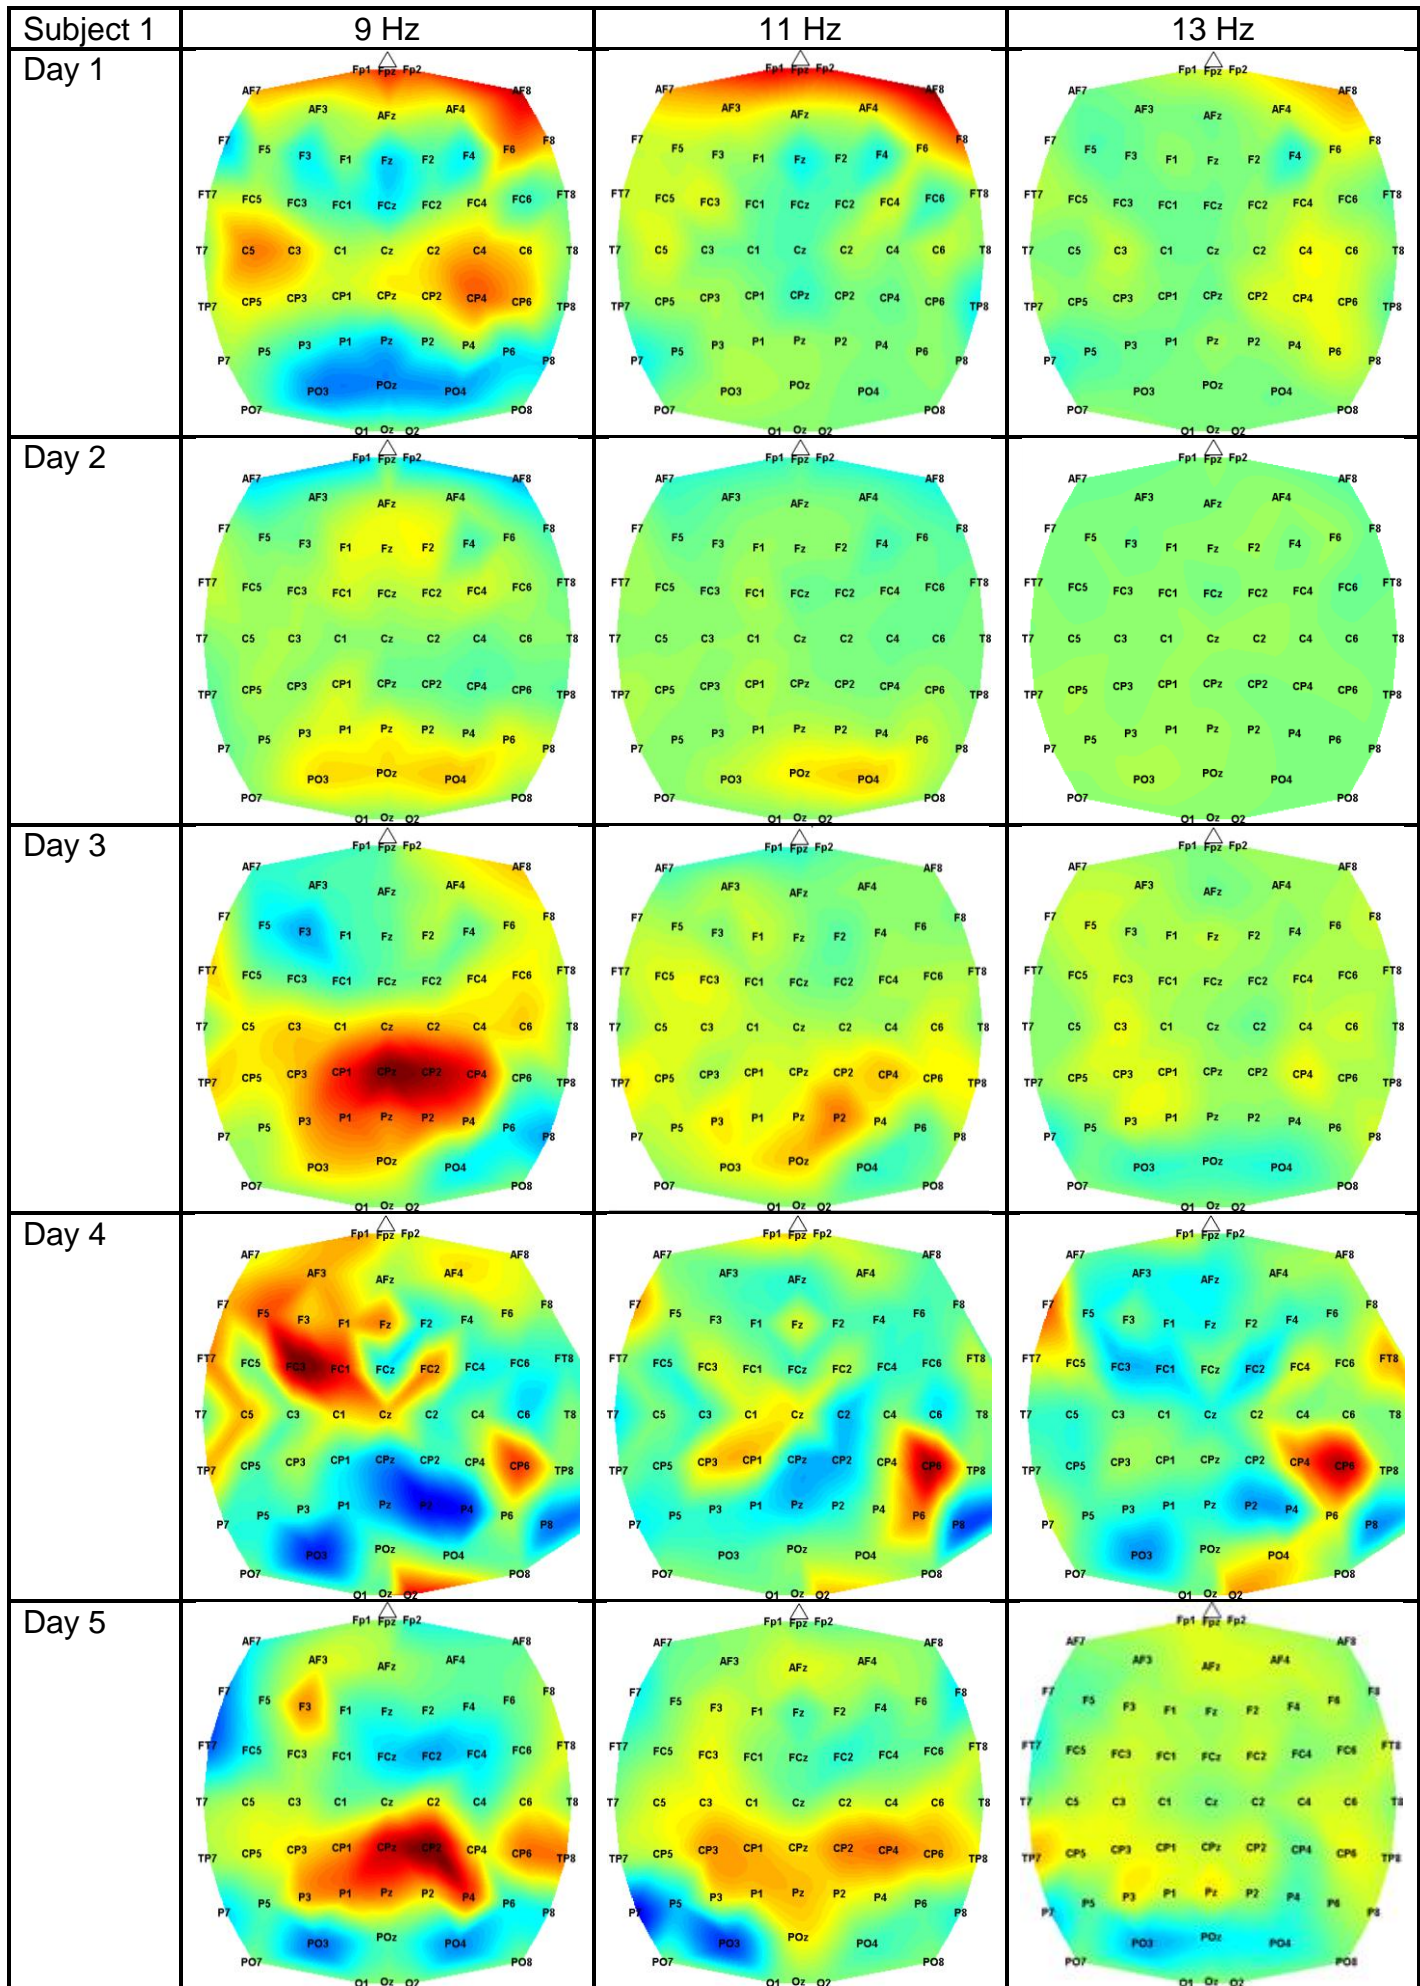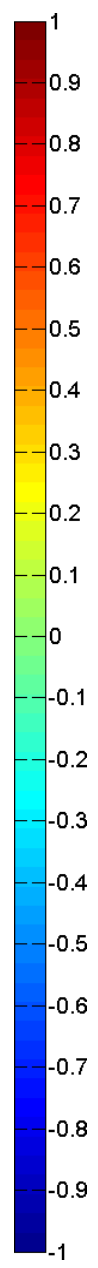

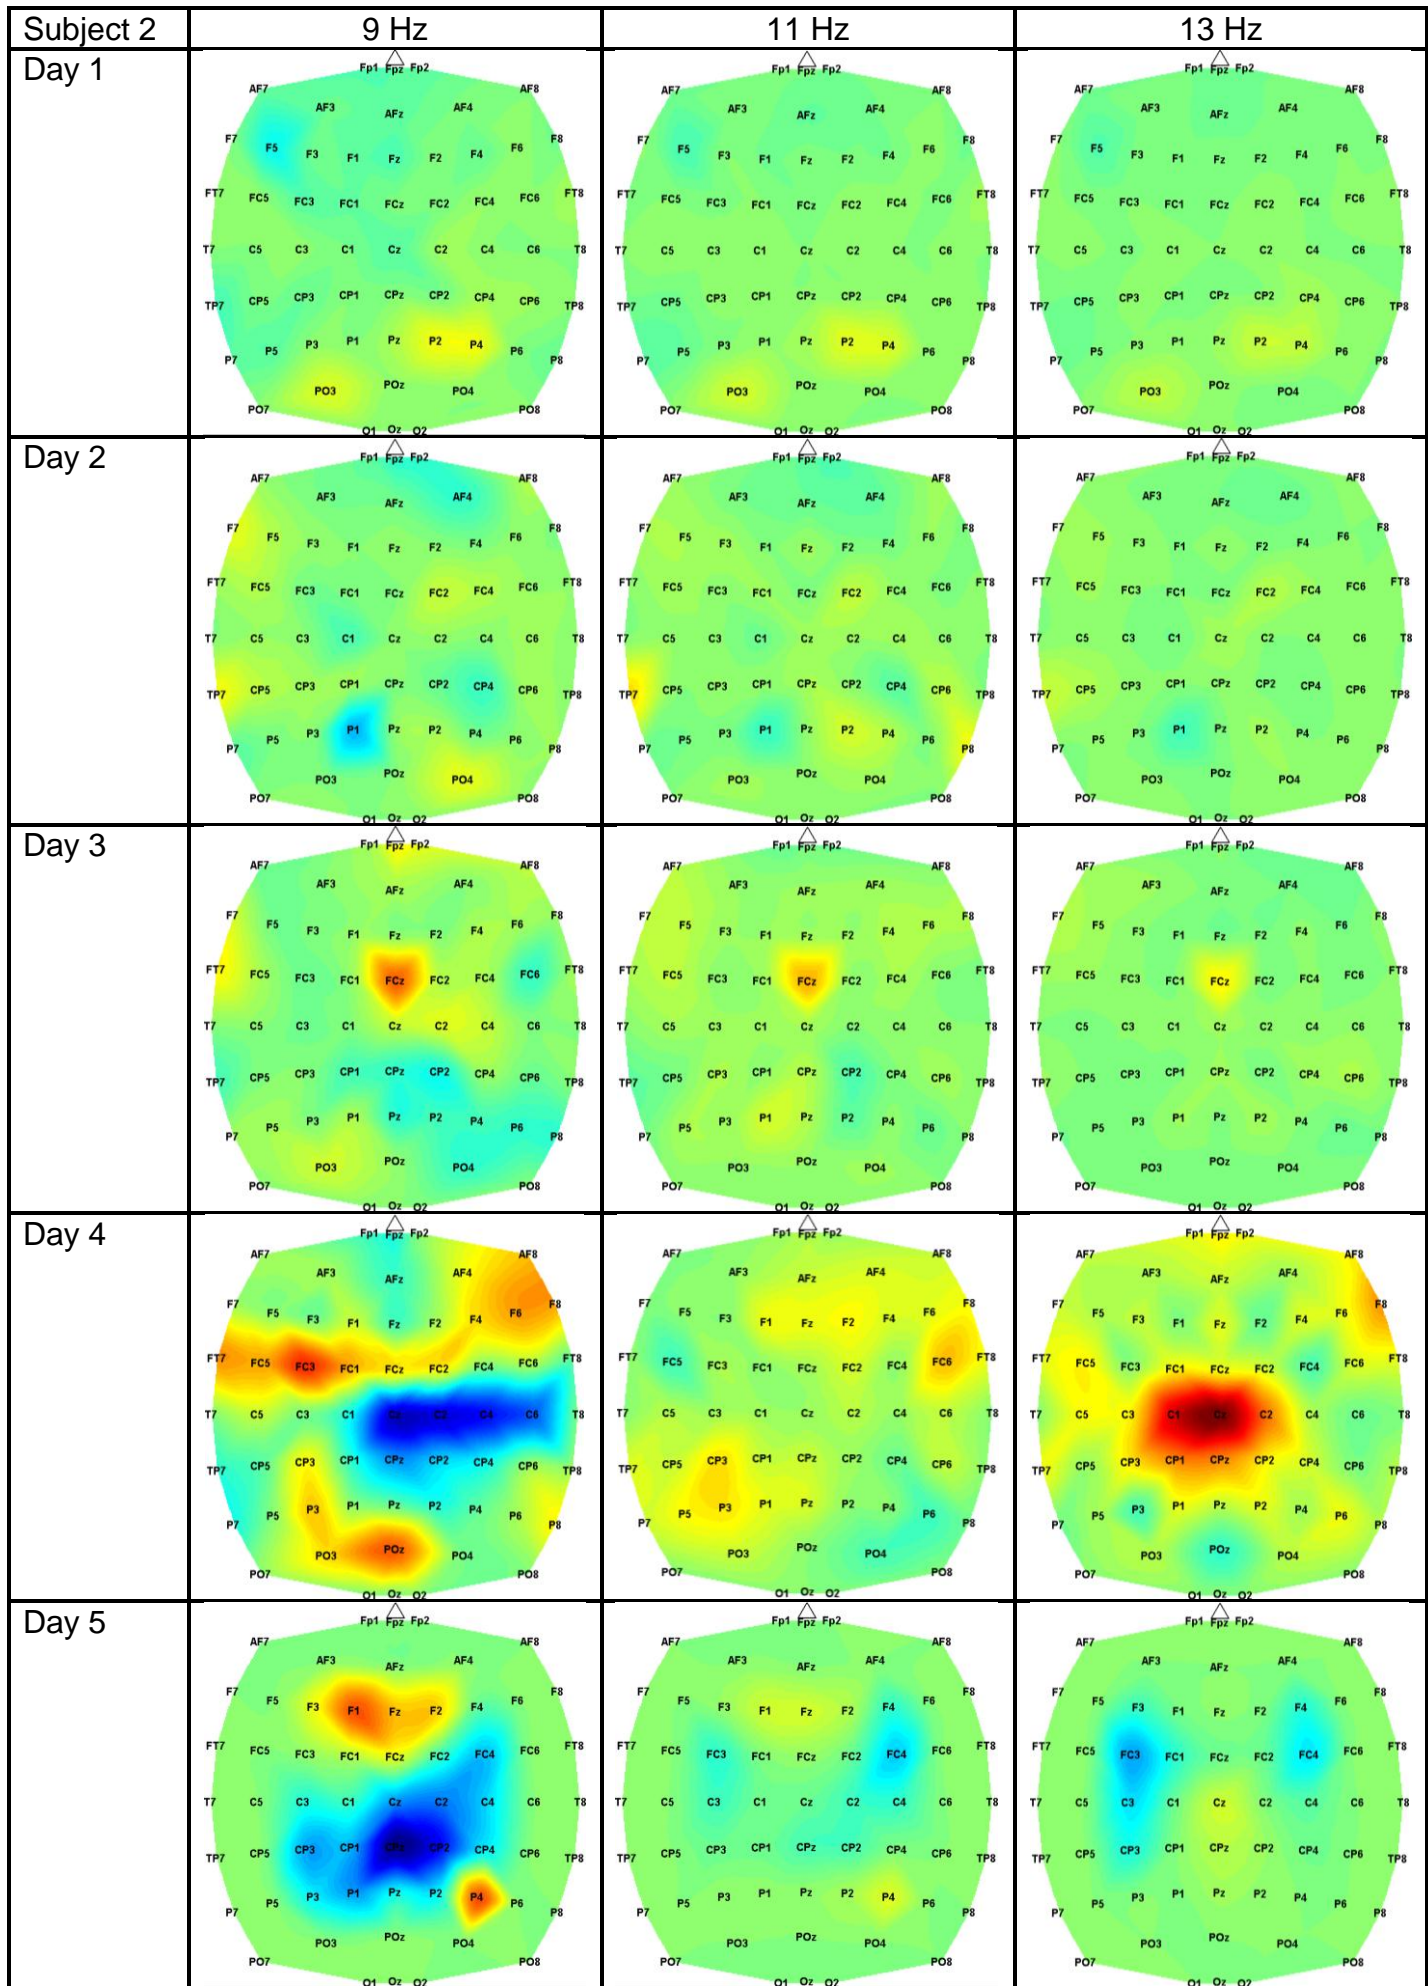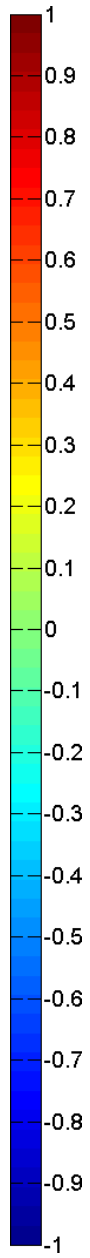

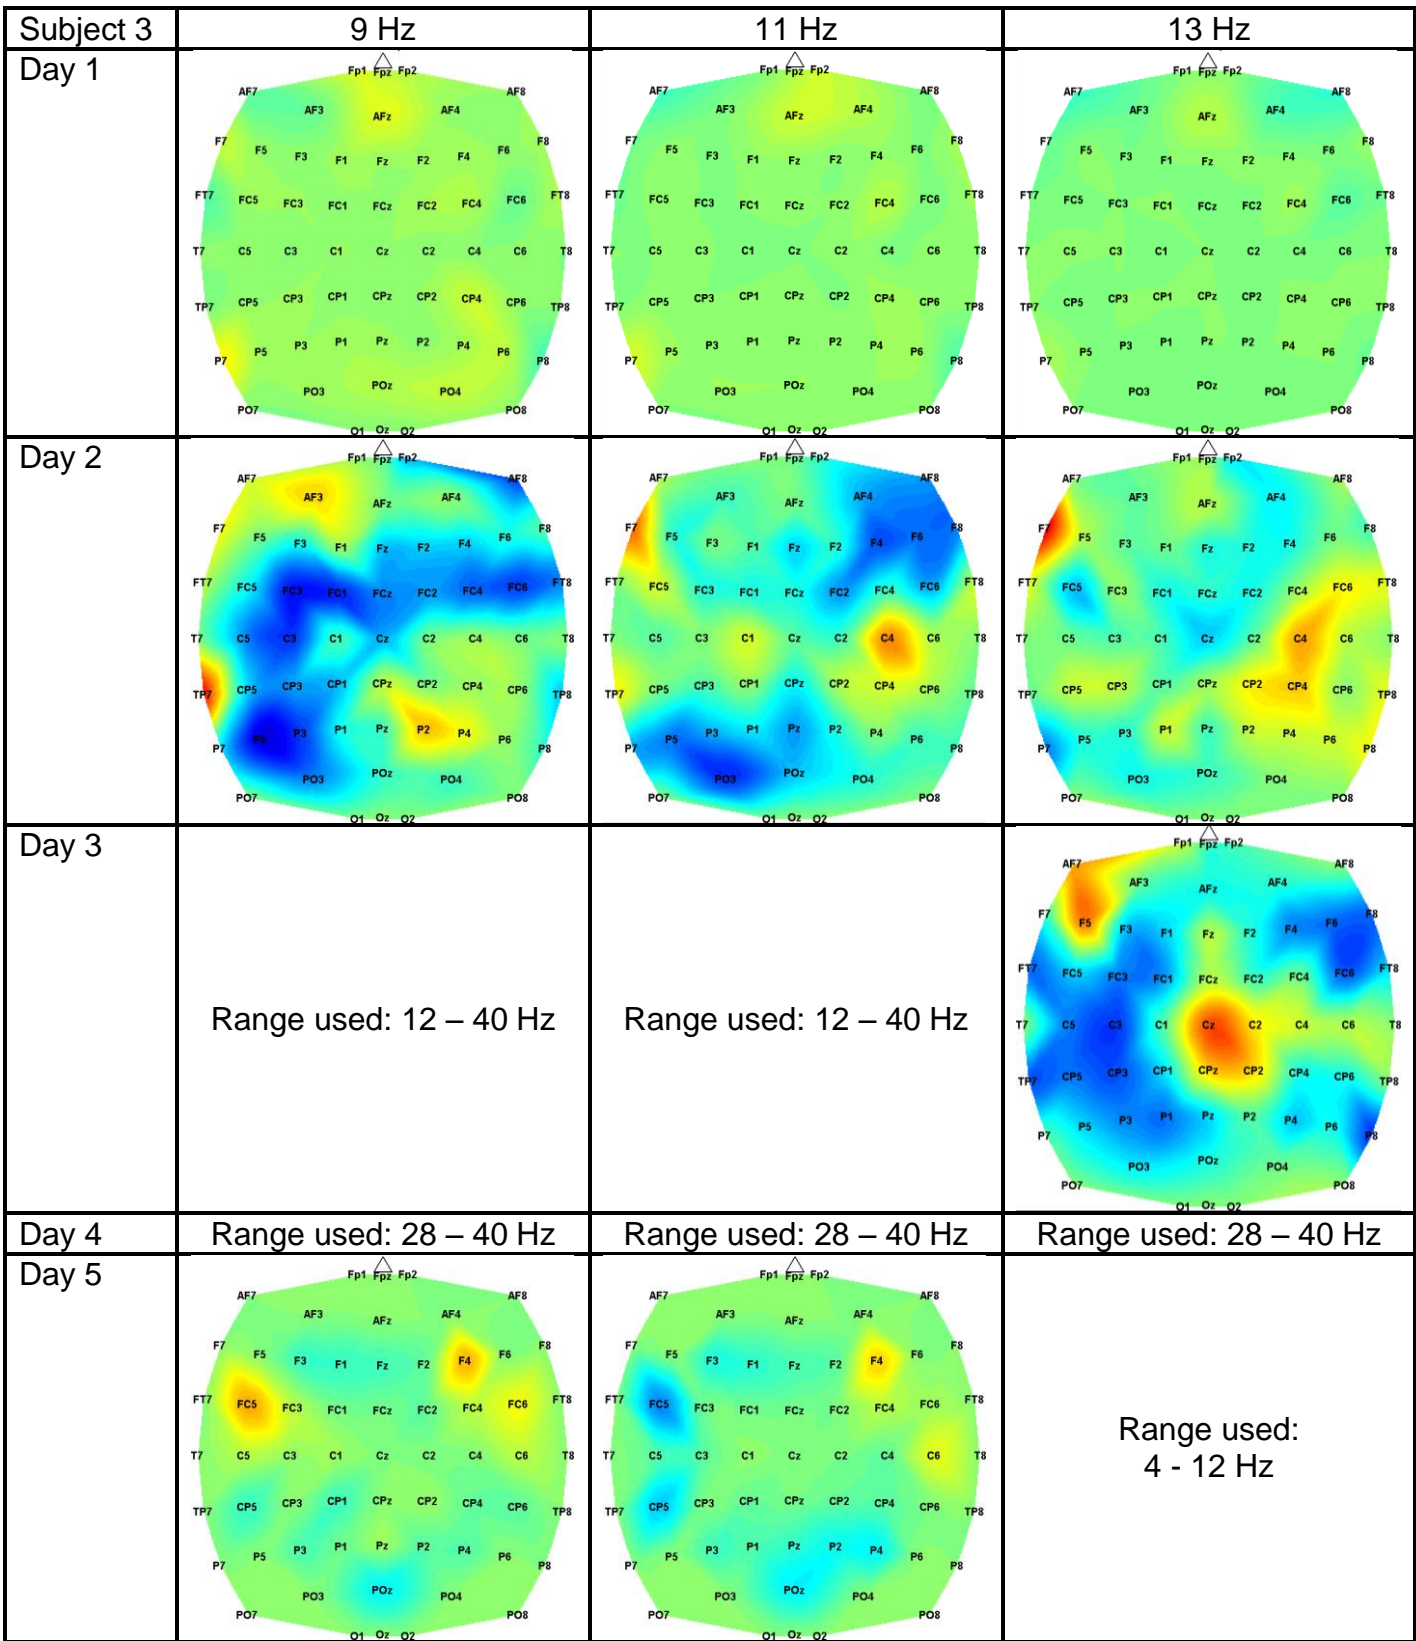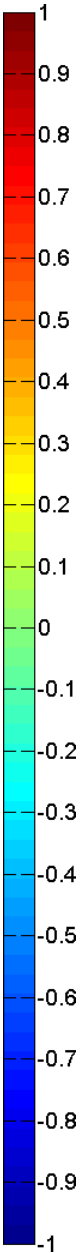

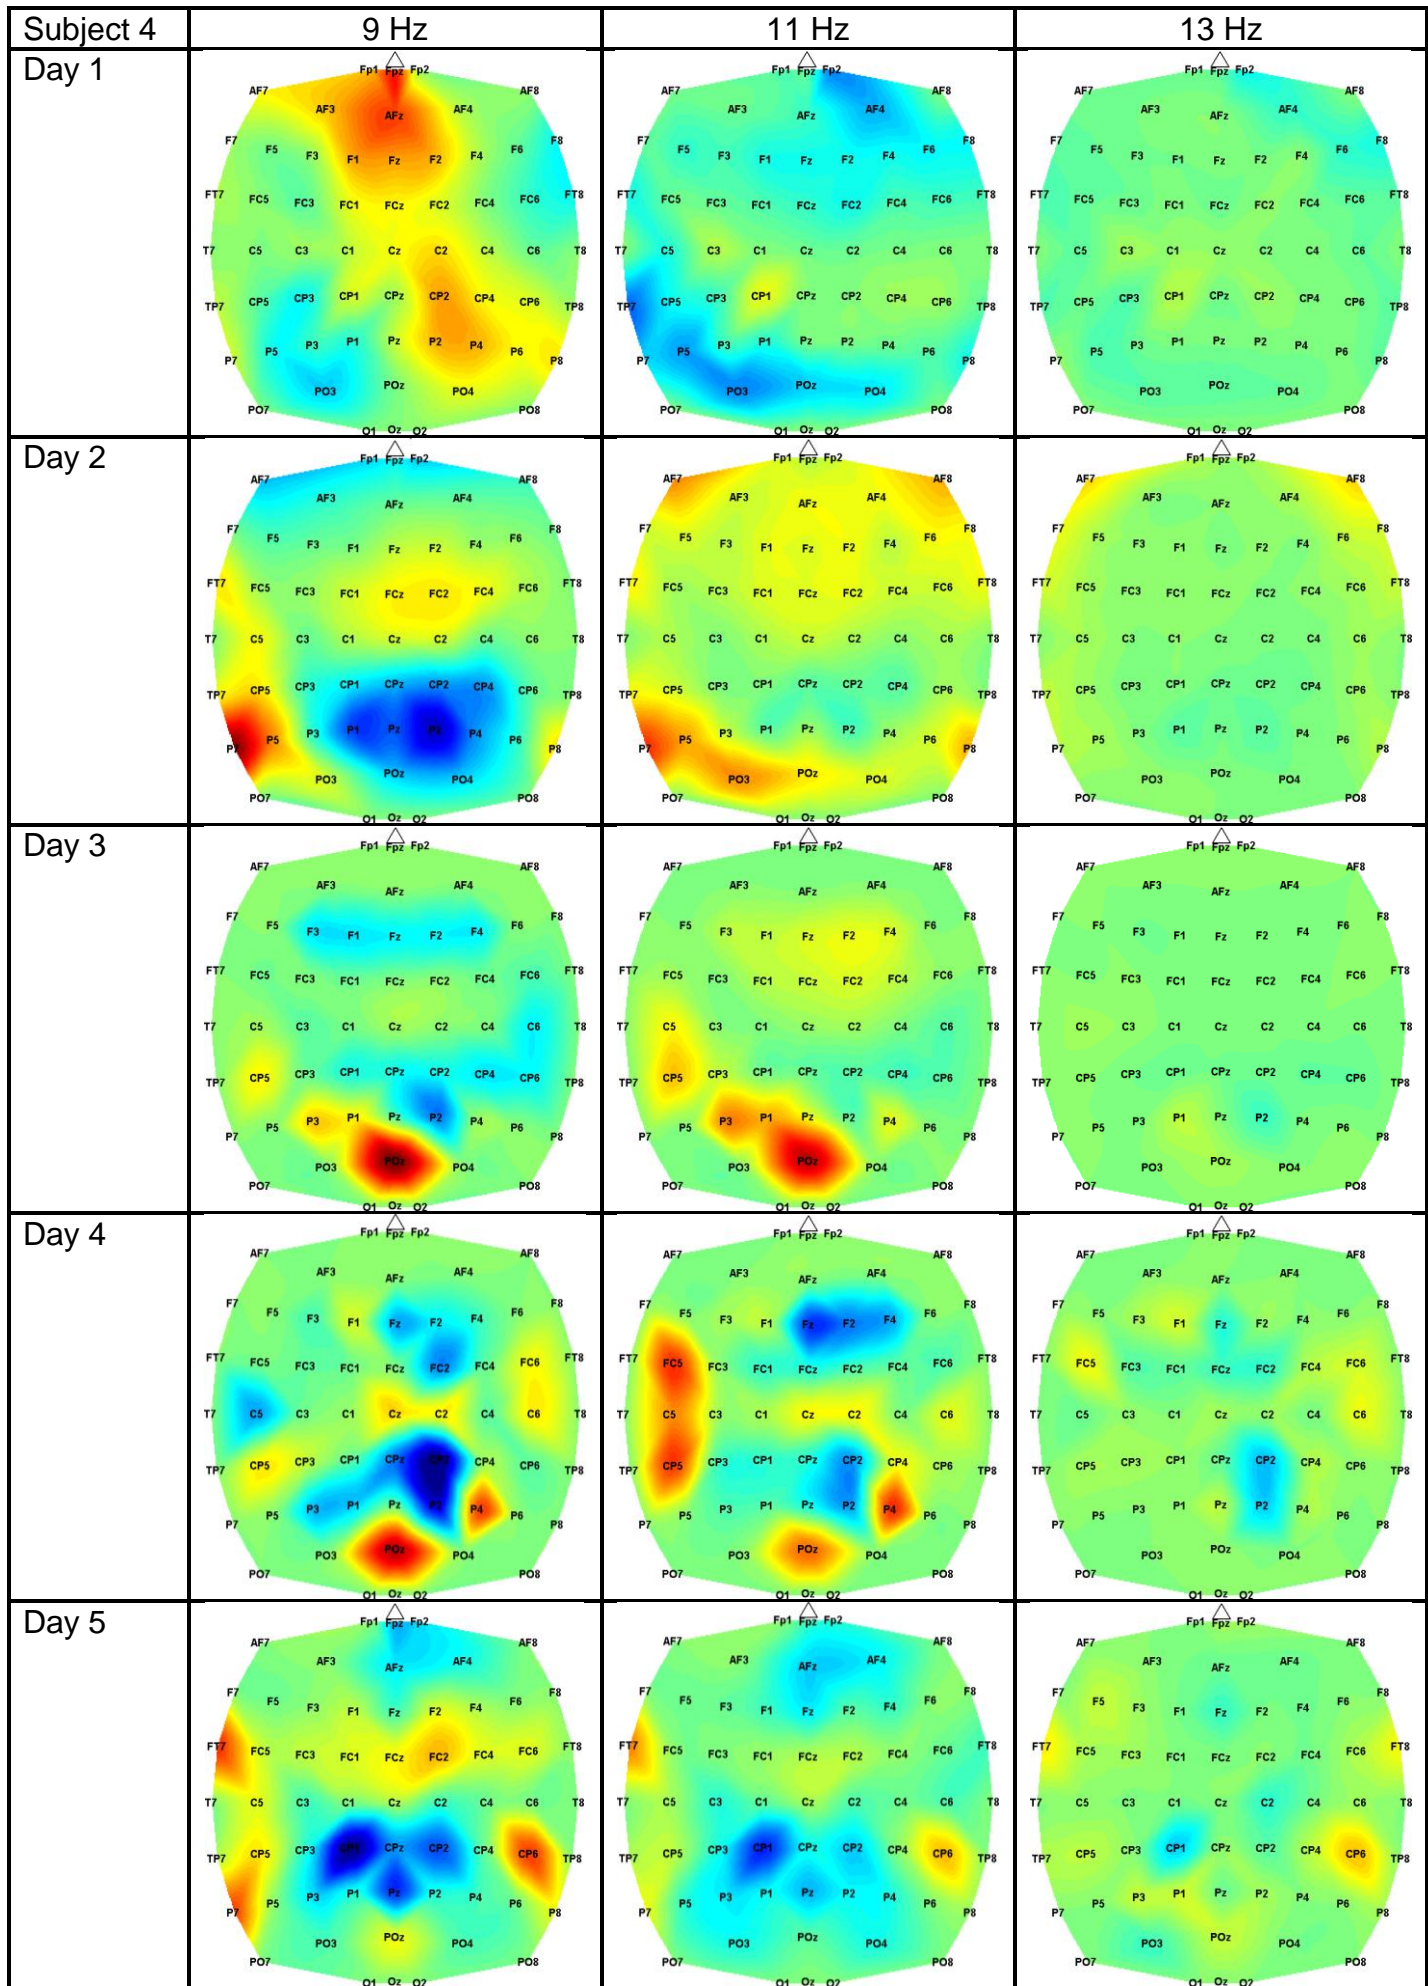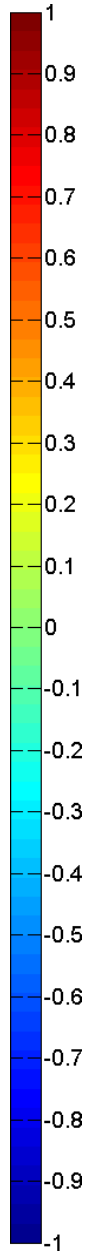

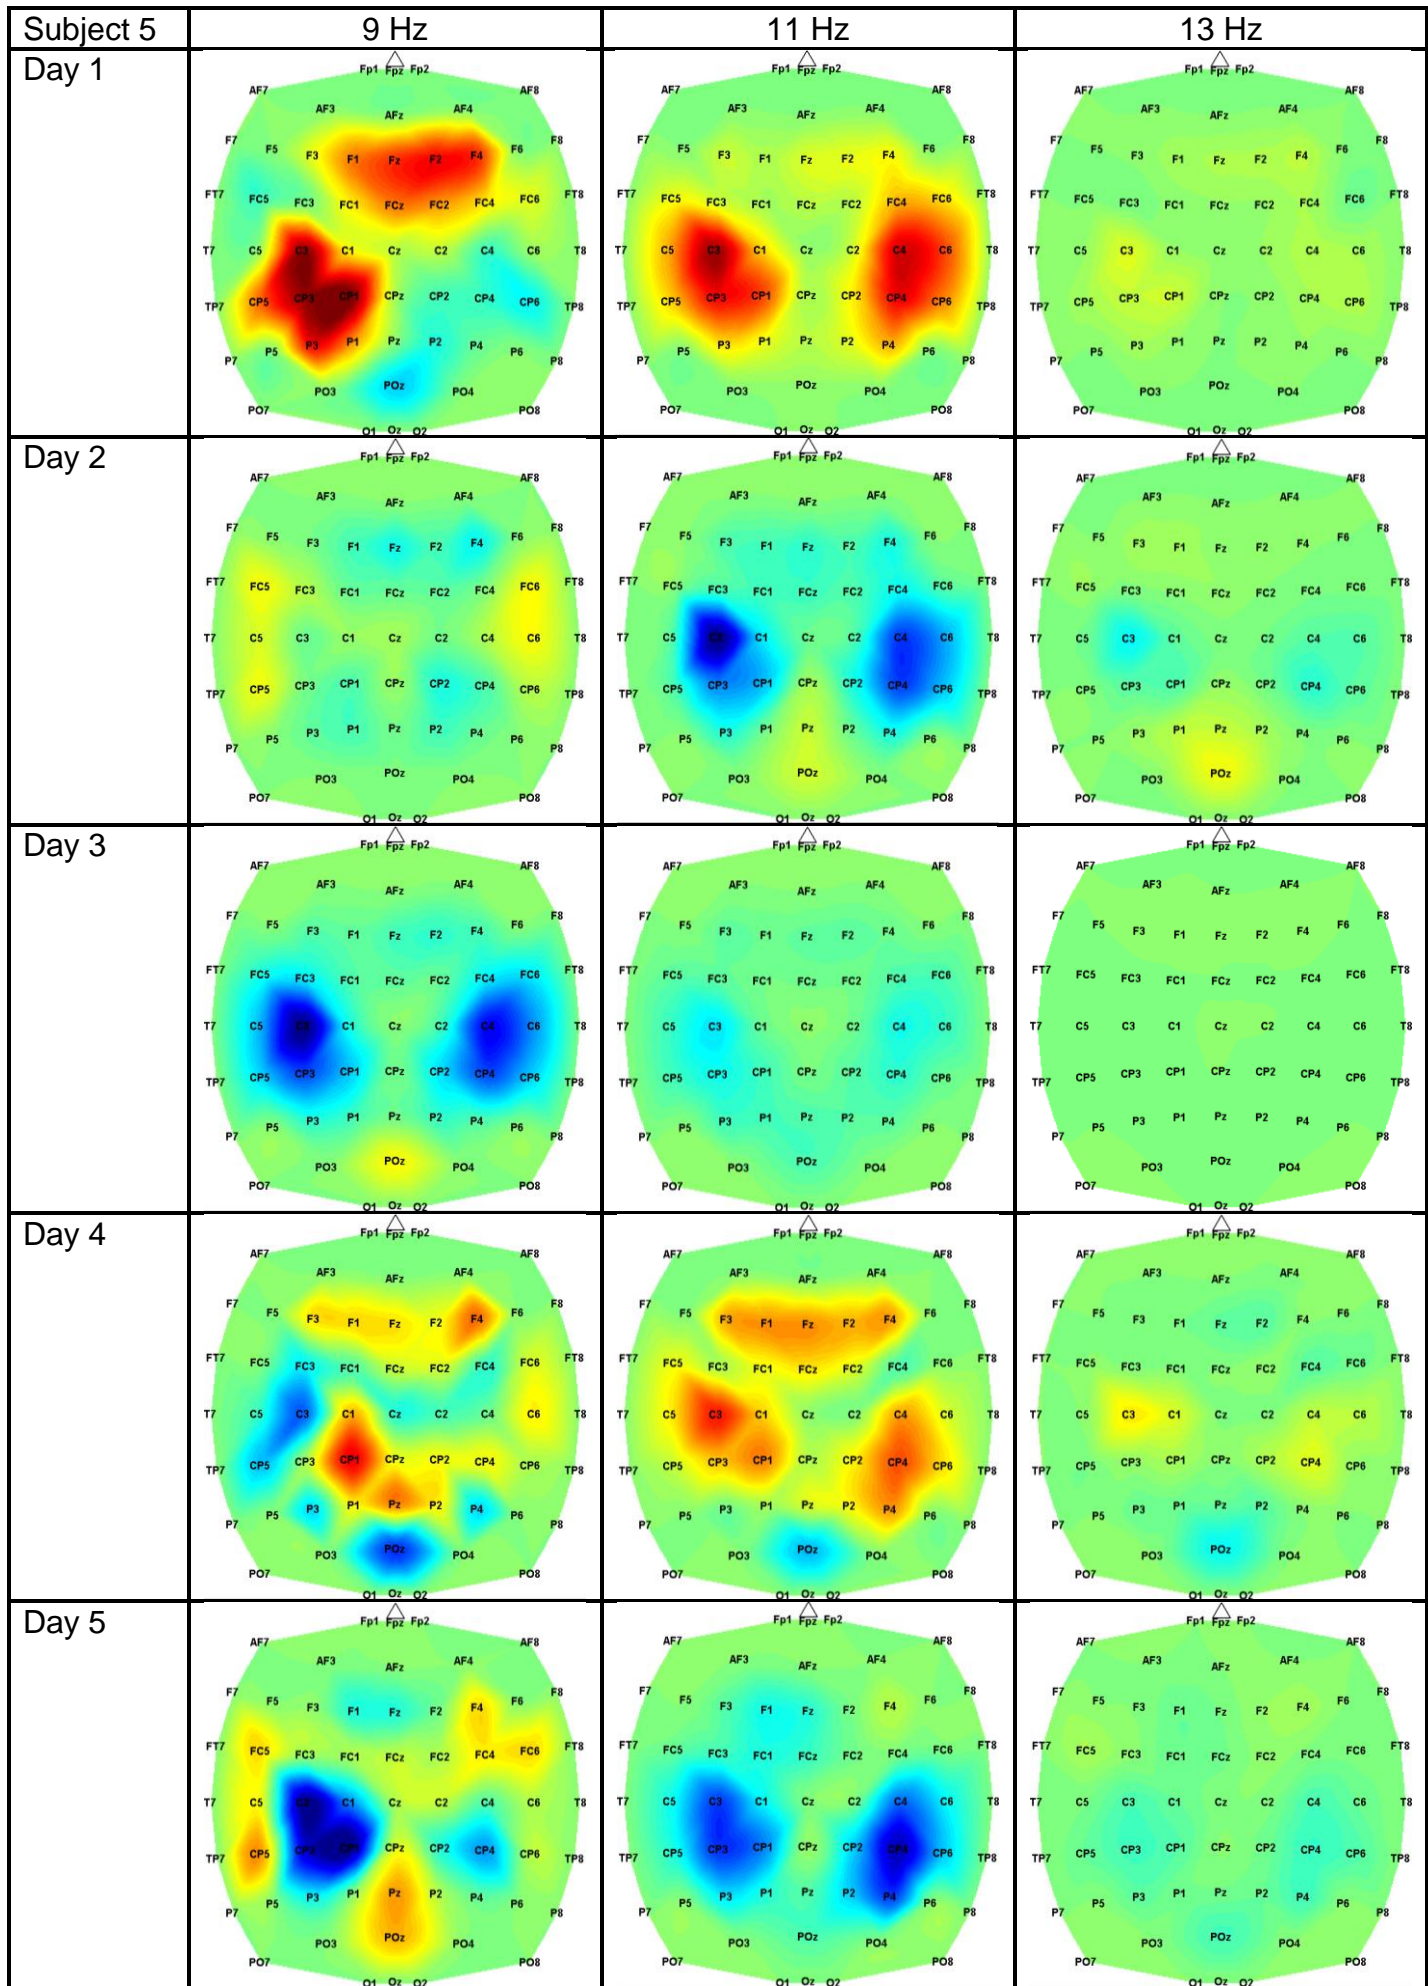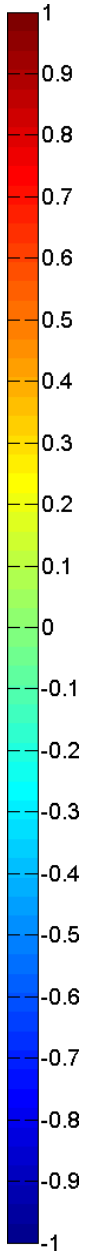

Supplement: 1743-0003-10-77-S1.pdf [file 1743-0003-10-77-S1.pdf]
